# Supplementary material for: Gli2 modulates cell cycle re-entry through autophagy-mediated regulation of the length of primary cilia
Source: Oxford University Press journal article supplement (doi:10.1242/jcs.221218), 2018-11-21
Supplement: jcs221218supp.pdf [file jcs221218supp.pdf]

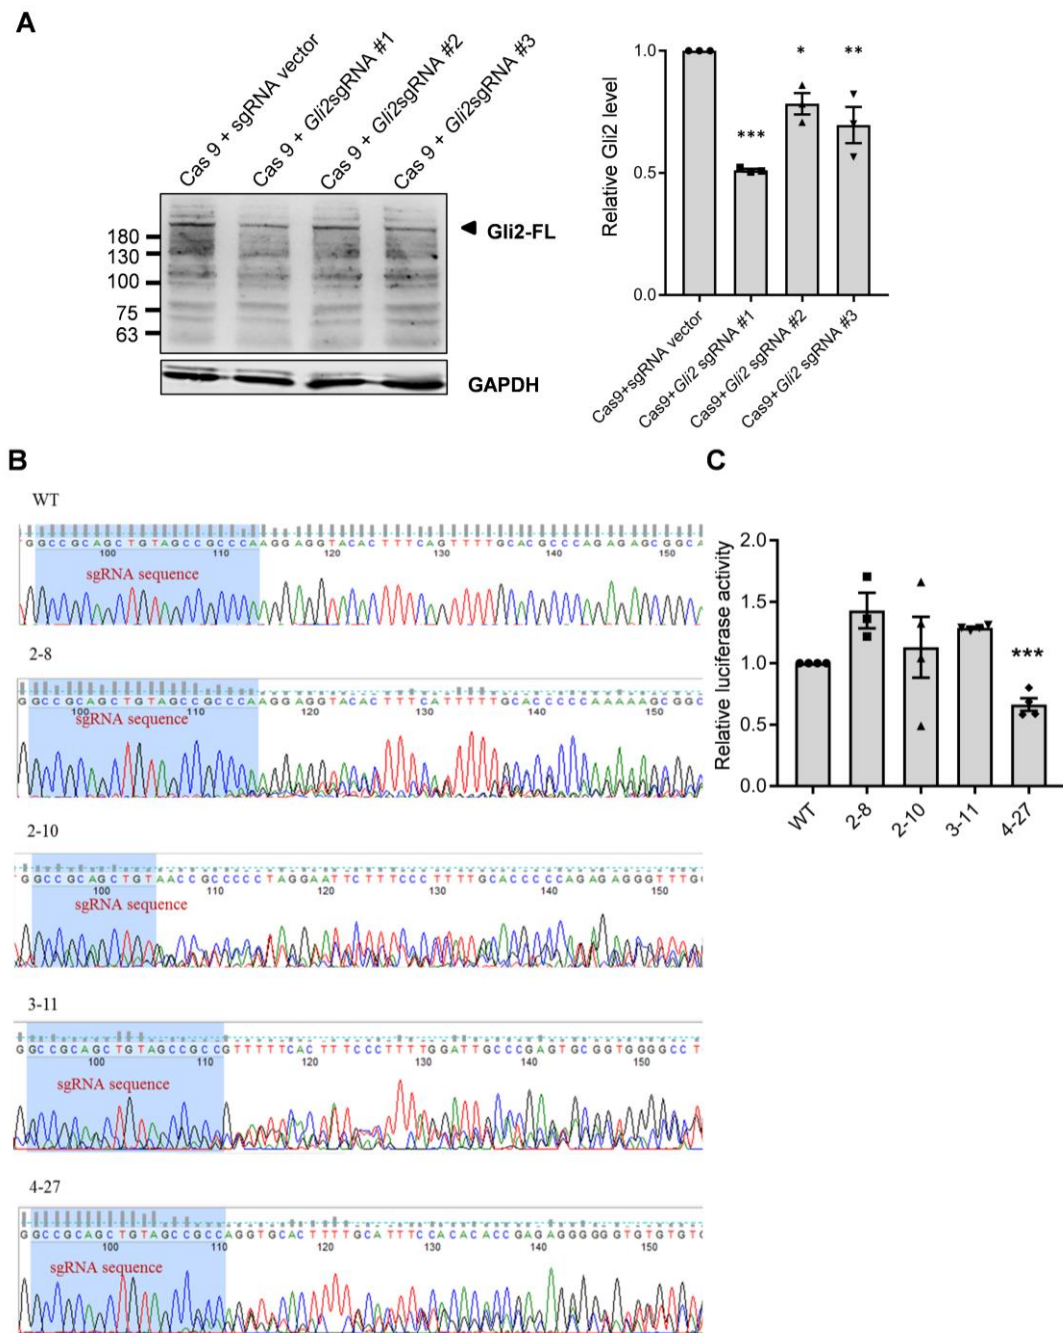

**Figure S1. Selection and validation of ideal NIH3T3 clone for Gli2 knockout**

- (A) Protein lysates from NIH3T3 cells, transfected with Cas9 along with either sgRNA vector, Gli2sgRNA#1, Gli2sgRNA#2 or Gli2sgRNA#3, were immunoblotted for Gli2 or GAPDH (loading control). Bar graph along with individual data points represents the relative Gli2 protein level in each group (n = 3 trials). One-way ANOVA, post-hoc: Bonferroni test, \*:  $p < 0.05$ , \*\*:  $p < 0.01$ , \*\*\*:  $p < 0.001$ .
- (B) NIH3T3 cells were transfected with Gli2sgRNA#1 and Cas9, followed by expansion of 104 single cells for genomic DNA sequencing. Among them, clone #2-8, #2-10, #3-11, and #4-27 showed disruptions in the exon 2 portion of *Gli2* gene next to the sgRNA targeting sequence (blue).
- (C) Gli-luciferase assay of the clone #2-8, #2-10, #3-11, and #4-27. Bar graph along with individual data points shows that the luciferase activity in clone #4-27 was significantly decreased compared to the wild type (n = 3 trials).

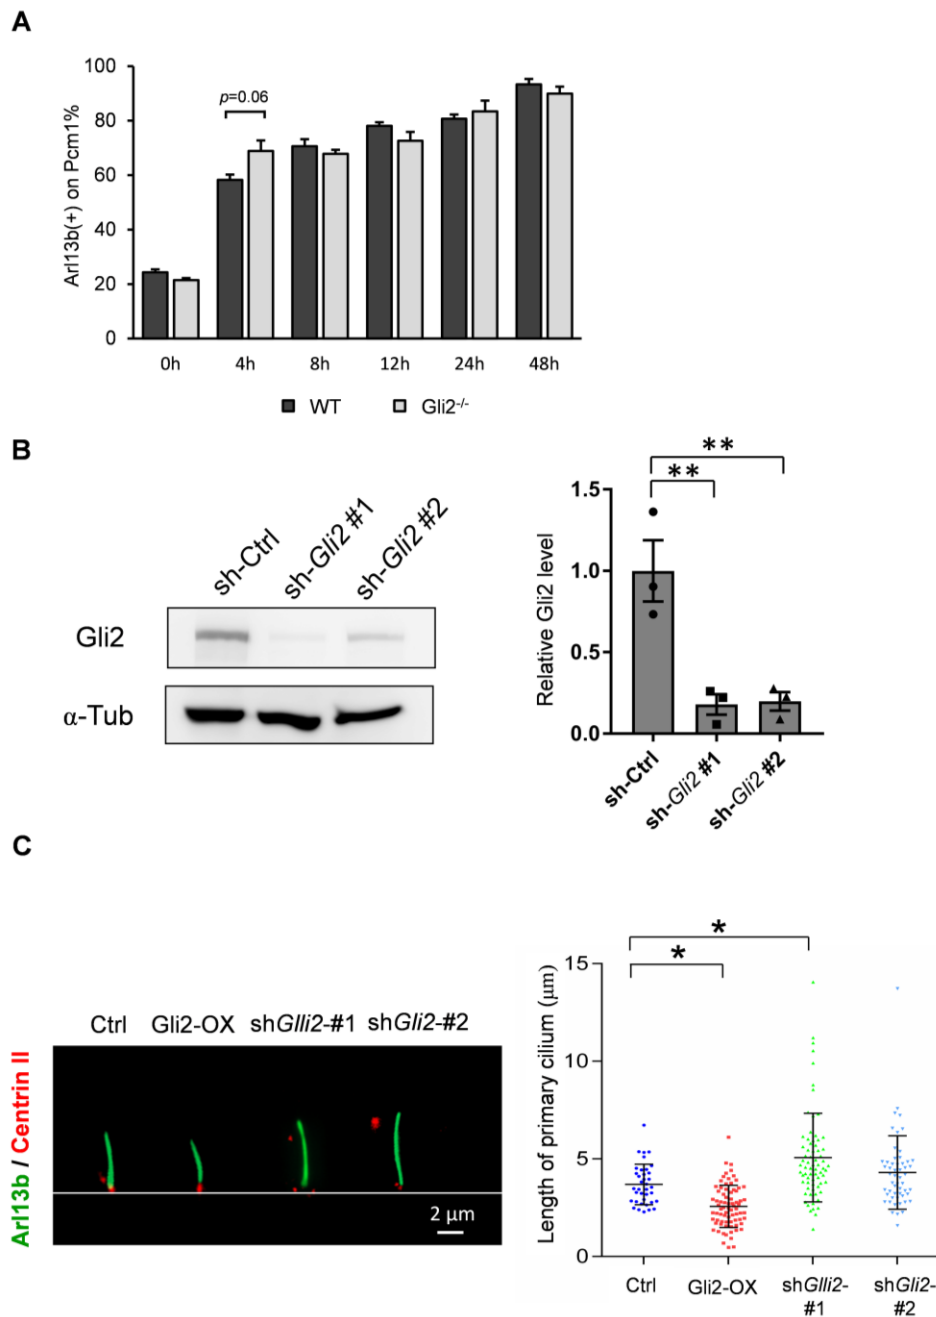

**Figure S2. Percentage of ciliated cells and ciliary length in wild type and Gli2 depleted cells**

- (A) Statistics for the percentage of ciliated cells in NIH3T3<sup>WT</sup> and NIH3T3<sup>Gli2<sup>-/-</sup></sup> cells after serum starvation for indicated times. Bar graph exhibited that there is no difference between NIH3T3<sup>WT</sup> cells and NIH3T3<sup>Gli2<sup>-/-</sup></sup> cells possessing the primary cilium labelled by Arl13b. Cell were counted from 3 trials and cell numbers are listed as (WT, Gli2<sup>-/-</sup>): 0hr (225, 299); 4hr (170, 179); 8hr (257, 333); 12hr (252, 281); 24hr (320, 313); 48hr (90, 93). Student's *t* test: *p*>0.05.
- (B) Gli2 expression in NIH3T3 cells transfected with shRNAs. Protein lysates from NIH3T3 cells transfected with sh-Ctrl, sh-Gli2 #1, and sh-Gli2 #2 were immunoblotted with antibody against Gli2 and  $\alpha$ -tubulin ( $\alpha$ -Tub, loading control). Bar graph along with individual data points shows decreased Gli2 expression by both shRNAs (n = 3). One-way ANOVA, post-hoc: Bonferroni test, \*\*: *p*<0.01.

(C) Examples of primary cilia in live NIH3T3 cells transfected with Gli2 overexpression or shRNA constructs after serum starvation for 24 hrs. PC2-Arl13bGFP (Green) and pmCherry-Centrin II (Red) were co-transfected to mark the primary cilia and basal bodies. Scatter plots shows that Gli2 knockdown by sh-*Gli2* #1 (n = 71 cells) or sh-*Gli2* #2 (n = 54 cells) increased the length of primary cilia compared to control cells (n = 37 cells), while Gli2-OX (n = 76 cells) slightly reduced the length of primary cilia. Kruskal Wallis test:  $p < 0.001$ . Post-hoc: Mann-Whitney U test, \*:  $p < 0.05$ .

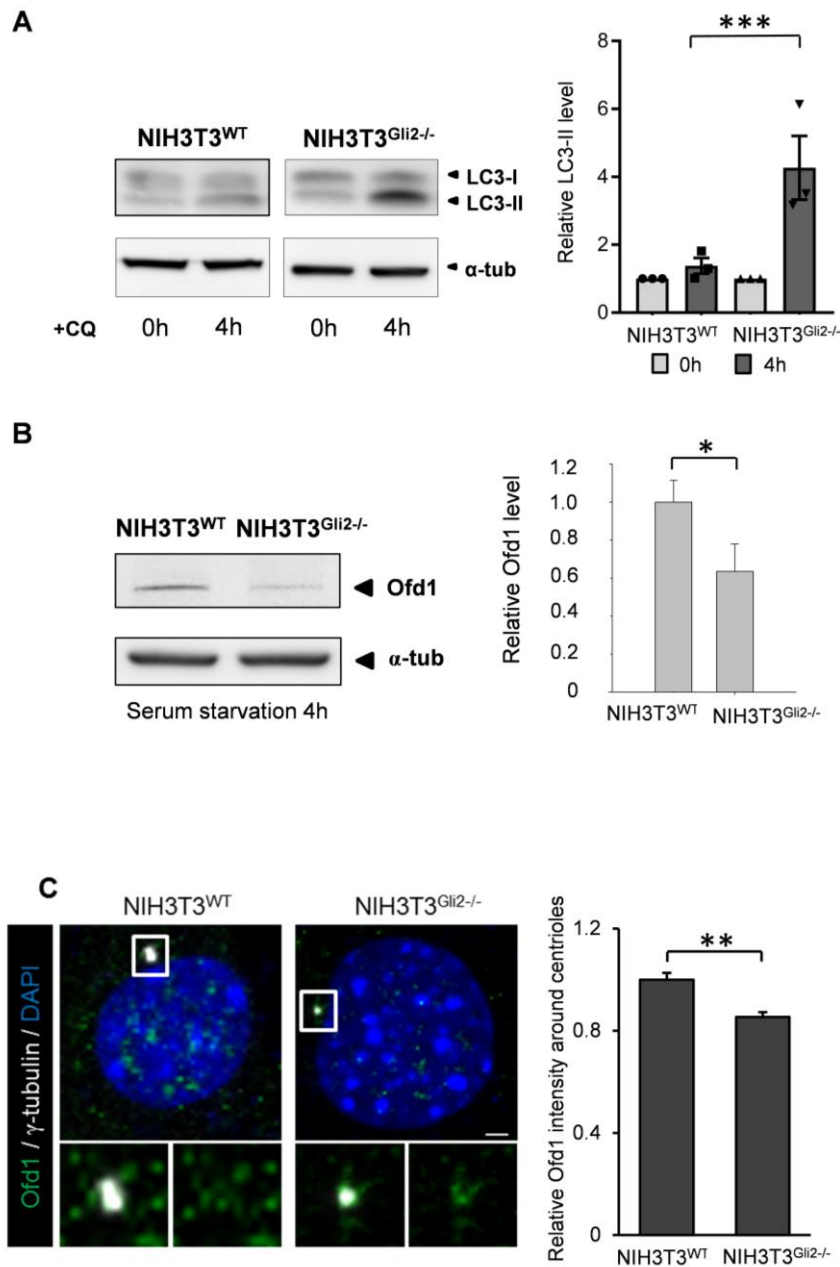

**Figure S3. The induction of LC3-II and the reduction of Ofd1 in Gli2 knockout cells**

- (A) Protein lysates from NIH3T3<sup>WT</sup> cells and NIH3T3<sup>Gli2-/-</sup> cells were treated with CQ for 0h and 4h under serum free condition, and then immunoblotted with antibody against LC3, and α-tubulin (α-tub, loading control). Bar graph along with individual data points exhibits the relative protein level of LC3-II at 4h compared to the basal condition (0h) in each group. N = 3 trials, Mann-Whitney *U* test, \*\*\*:  $p < 0.001$ .
- (B) Protein lysates were collected from NIH3T3<sup>WT</sup> and NIH3T3<sup>Gli2-/-</sup> cells after serum starvation for 4h, and immunoblotted for Ofd1, and α-tub (loading control). Bar graph shows the relative protein levels of Ofd1 in NIH3T3<sup>Gli2-/-</sup> cells compared to WT cells; n = 6 trials, \*:  $p < 0.05$ , student's *t* test.
- (C) Immunostaining of Ofd1 satellites (Green) around the centrioles (γ-tubulin, white) in NIH3T3<sup>WT</sup> cells and NIH3T3<sup>Gli2-/-</sup> cells after serum starvation for 24h. Boxed regions are enlarged in the bottom. Scale bar: 2μm. Bar graph shows the relative Ofd1 intensity surrounding the centrioles. NIH3T3<sup>WT</sup>: n = 169 cells, NIH3T3<sup>Gli2-/-</sup>: n = 127 cells. Mann-Whitney *U* test, \*\*:  $p < 0.01$ .

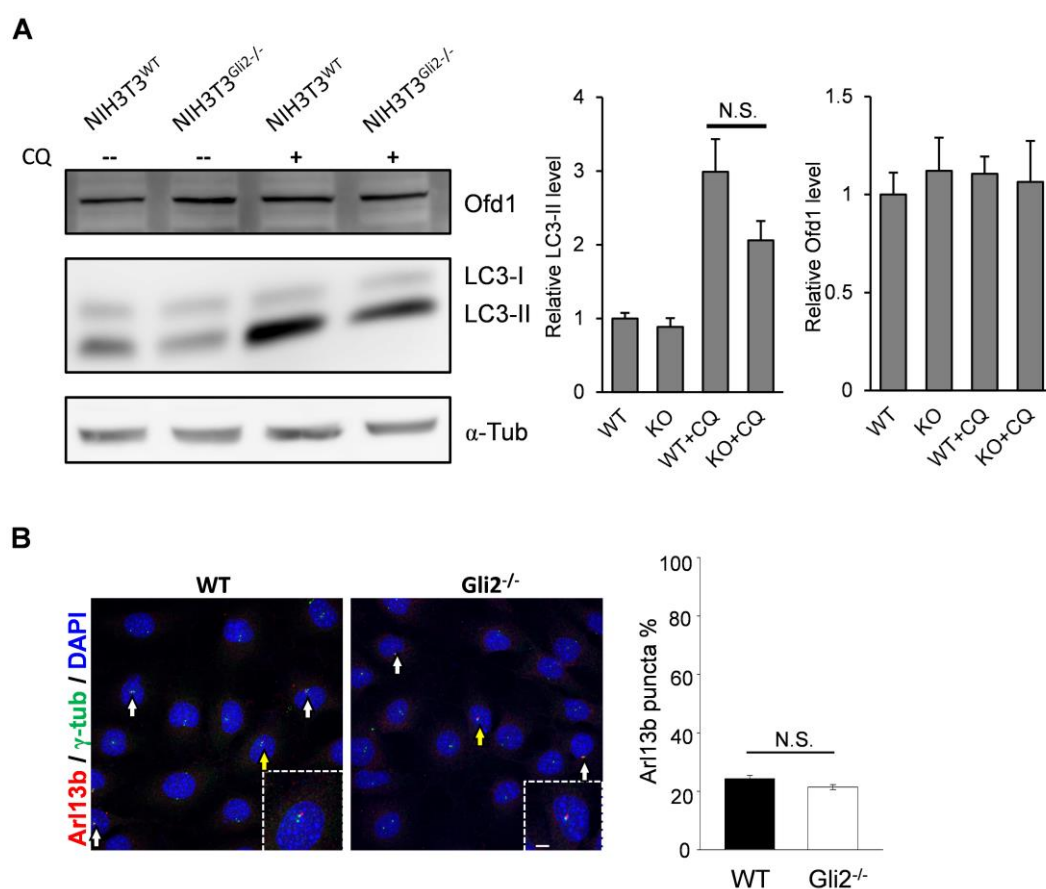

**Figure S4. Comparable autophagy activity, Odf1 protein level and percentage of primary cilium in Gli2 knockout cells under basal condition**

- (A) Protein lysates from NIH3T3<sup>WT</sup> and NIH3T3<sup>Gli2-/-</sup> cells were treated with or without CQ for 4h under serum-rich condition, following by immunoblotting with antibody against Odf1, LC3, and  $\alpha$ -tubulin ( $\alpha$ -tub, loading control). Bar graph displayed the relative protein level in each condition. n = 6 trials; ANOVA test, post-hoc: Bonferroni test.
- (B) Immunostaining of primary cilia (Arl13b, red), centrioles ( $\gamma$ -tubulin, green) and DAPI (blue) under serum-rich condition. Arl13b<sup>+</sup> puncta (arrows) were seldom detectable in both NIH3T3<sup>WT</sup> and NIH3T3<sup>Gli2-/-</sup> cells. Centrioles pointed by the yellow arrows were magnified in the inlets. Scale bar: 5 $\mu$ m. Bar graph represents the percentage of centrioles possessing the Arl13b<sup>+</sup> puncta. N = 225 in NIH3T3<sup>WT</sup> cells, N = 299 in NIH3T3<sup>Gli2-/-</sup> cells; student's *t* test,  $p > 0.05$ .

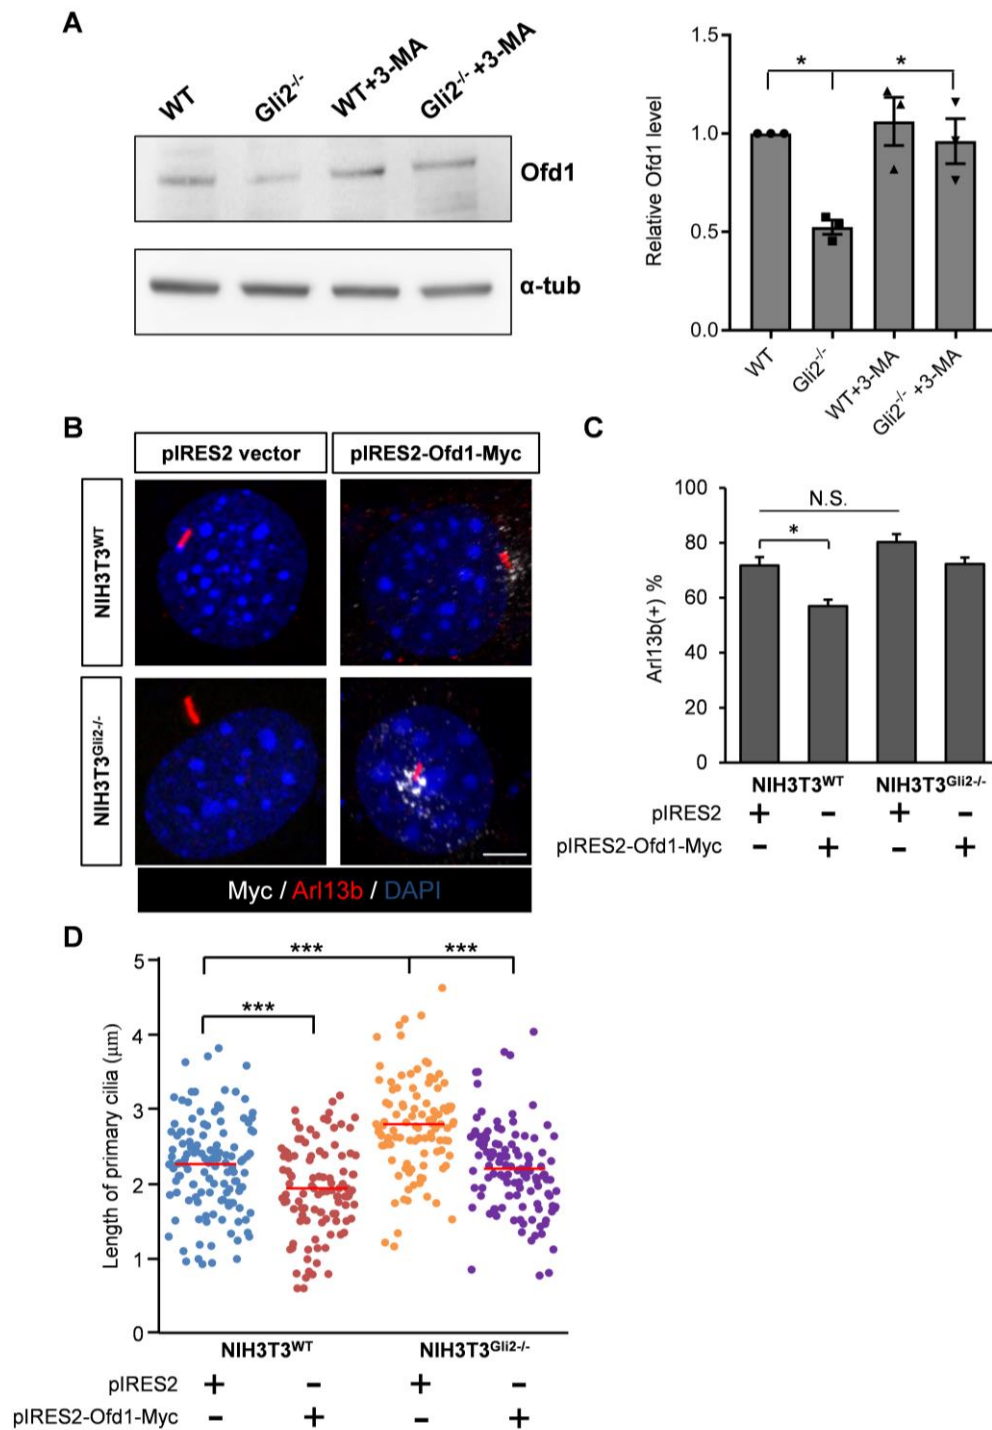

**Figure S5. Rescue effect of Ofd1 reduction and ciliary elongation in Gli2 knockout cells treated with autophagy inhibitors and Ofd1 overexpression**

(A) Protein lysates from NIH3T3<sup>WT</sup> cells and NIH3T3<sup>Gli2<sup>-/-</sup></sup> cells treated with or without 3-MA during serum starvation for 4h, were immunoblotted with antibodies against Ofd1 and  $\alpha$ -tubulin. Bar graph along with individual data points represents the relative Ofd1 protein level in each condition.  $n = 3$ , ANOVA:  $p = 0.008$ ; post-hoc: Bonferroni test, \*:  $p < 0.05$ .

(B) Immunostaining of Arl13b (red), myc-tag (Gray) and DAPI (blue) in NIH3T3<sup>WT</sup> and NIH3T3<sup>Gli2<sup>-/-</sup></sup> cells transfected with either vector (pIRES2) or myc-tagged Ofd1 (pIRES2-Ofd1-Myc) and

serum starved for 24h. Expression of *Odf1* shortened the length of primary cilia. Scale bar: 5 $\mu$ m.

(C) Bar graph represents the percentage of ciliated cells in each group. number of cells (WT, *Gli2*<sup>-/-</sup>) transfected with pIRES2 = (291, 182); with pIRES2-*Odf1*-myc = (208, 214). ANOVA test, post-hoc: Bonferroni test, \*:  $p < 0.05$ .

(D) Scatter plot exhibits the length of individual primary cilium in each group. Red lines mark the mean. Expression of *Odf1*-myc significantly reversed the lengthening of primary cilia in NIH3T3<sup>*Gli2*<sup>-/-</sup></sup> cells. In NIH3T3<sup>WT</sup> cells,  $n = 126$  and 104 cilia for pIRES2 and pIRES2-*Odf1*-myc respectively; meanwhile,  $n = 104$  and 118 cilia for NIH3T3<sup>*Gli2*<sup>-/-</sup></sup> cells transfected with pIRES2 and pIRES2-*Odf1*-myc respectively. ANOVA test:  $p < 0.001$ . Post-hoc: Bonferroni test, \*\*\*:  $p < 0.001$ .

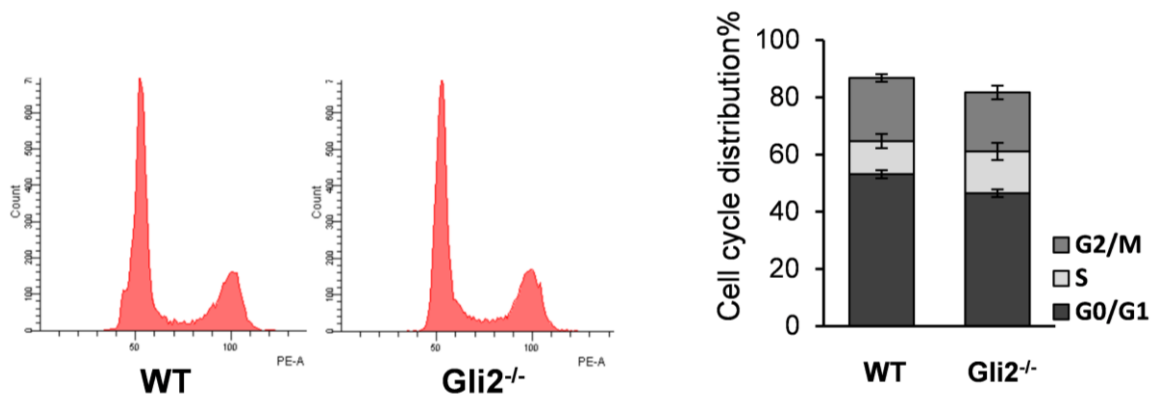

### Figure S6. *Gli2* knockout cells exhibit similar cell cycle distribution as wild type cells

Cell cycle analysis by flow cytometry in NIH3T3<sup>WT</sup> and NIH3T3<sup>*Gli2*<sup>-/-</sup></sup> cells for 24 hours after seeding. Bar graph indicates that the percentages of G0/G1, S and G2/M phases were not significant different between NIH3T3<sup>WT</sup> and NIH3T3<sup>*Gli2*<sup>-/-</sup></sup> cells ( $n = 3$  trials). Student's *t* test,  $p > 0.05$ .

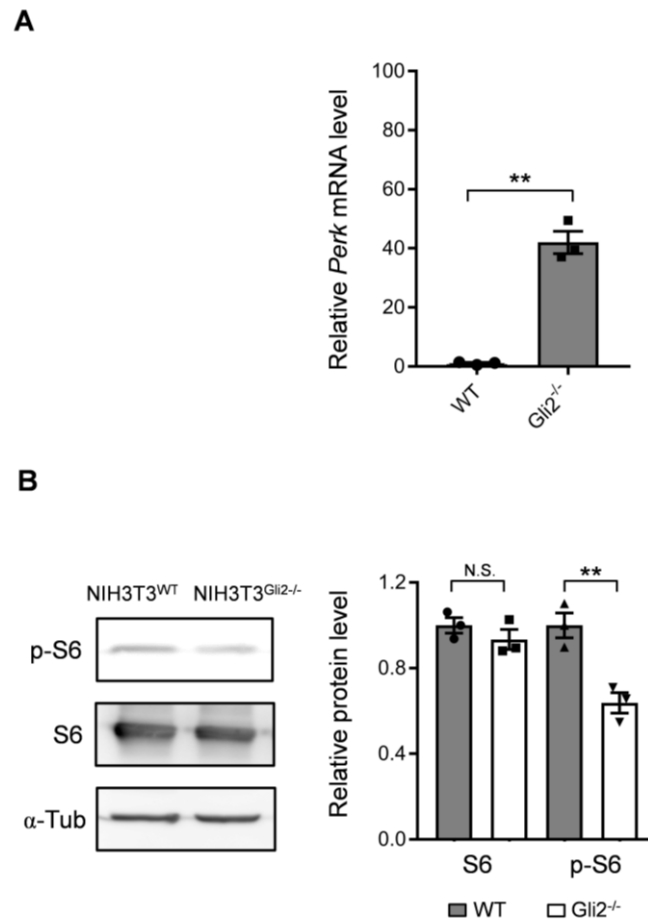

**Figure S7. Potential mechanism in downstream of Gli2 for autophagy activation**

- (A) RT-qPCR for the expression of *Perk* mRNA upon serum starvation for 24h. Bar graph along with individual data points shows a significant increase in *Perk* mRNA in NIH3T3<sup>Gli2<sup>-/-</sup></sup> cells compared to NIH3T3<sup>WT</sup>.  $n = 3$  trials. Student's  $t$  test, \*\*:  $p < 0.01$ .
- (B) Protein lysates from NIH3T3<sup>WT</sup> cells and NIH3T3<sup>Gli2<sup>-/-</sup></sup> cells after serum starvation for 4h, and then immunoblotted with antibody against phospho-ribosomal protein S6 (p-S6), S6 and  $\alpha$ -tubulin. Bar graph along with individual data points represents a significant decrease of the phosphorylation in S6 in NIH3T3<sup>Gli2<sup>-/-</sup></sup> cells compared to NIH3T3<sup>WT</sup> cells.  $n = 3$  trials. Student's  $t$  test, \*\*:  $p < 0.01$ .



**Table S1. Sequences for Gli2 guide RNA used in this study**

| No.                 | Direction | Sequence                                                          |
|---------------------|-----------|-------------------------------------------------------------------|
| <i>Gli2</i> sgRNA#1 | Forward   | TTTCTTGGCTTTATATATCTTGTGGAAAGGACGAAACA<br>CCGCCGCAGCTGTAGCCGCCCA  |
|                     | Reverse   | GACTAGCCTTATTTTAACTTGCTATTTCTAGCTCTAAAA<br>CTGGGCGGCTACAGCTGCGGC  |
| <i>Gli2</i> sgRNA#2 | Forward   | TTTCTTGGCTTTATATATCTTGTGGAAAGGACGAAACA<br>CCGTGCGGCCACCGCCAGAGGAC |
|                     | Reverse   | GACTAGCCTTATTTTAACTTGCTATTTCTAGCTCTAAAA<br>CGTCCTCTGGCGGTGGCCGCAC |
| <i>Gli2</i> sgRNA#3 | Forward   | TTTCTTGGCTTTATATATCTTGTGGAAAGGACGAAACA<br>CCGACAGCAGCTTCCCCGACCC  |
|                     | Reverse   | GACTAGCCTTATTTTAACTTGCTATTTCTAGCTCTAAAA<br>CGGGTCGGGGAAGCTGCTGTC  |

**Table S2. Query coverage of candidate Gli2 KO lines.**

| NIH3T3 cell number | Query cover (%) |
|--------------------|-----------------|
| 2-8                | 90%             |
| 2-10               | 99%             |
| 3-11               | 22%             |
| 4-27               | 10%             |
